# Supplementary material for: MerTK Expression and ERK Activation Are Essential for the Functional Maturation of Osteopontin‐Producing Reparative Macrophages After Myocardial Infarction
Source: PubMed Central journal article supplement — J Am Heart Assoc. 2020 Aug 31;9(18):e017071. doi: 10.1161/JAHA.120.017071 (PMC7726992; doi:10.1161/jaha.120.017071), 2020-08-31
Supplement: JAH3-9-e017071-s001.pdf [file JAH3-9-e017071-s001.pdf]

# **SUPPLEMENTAL MATERIAL**

# Figure S1. pSTAT3-MerTK-galectin-3 axis regulates osteopontin expression in vitro.

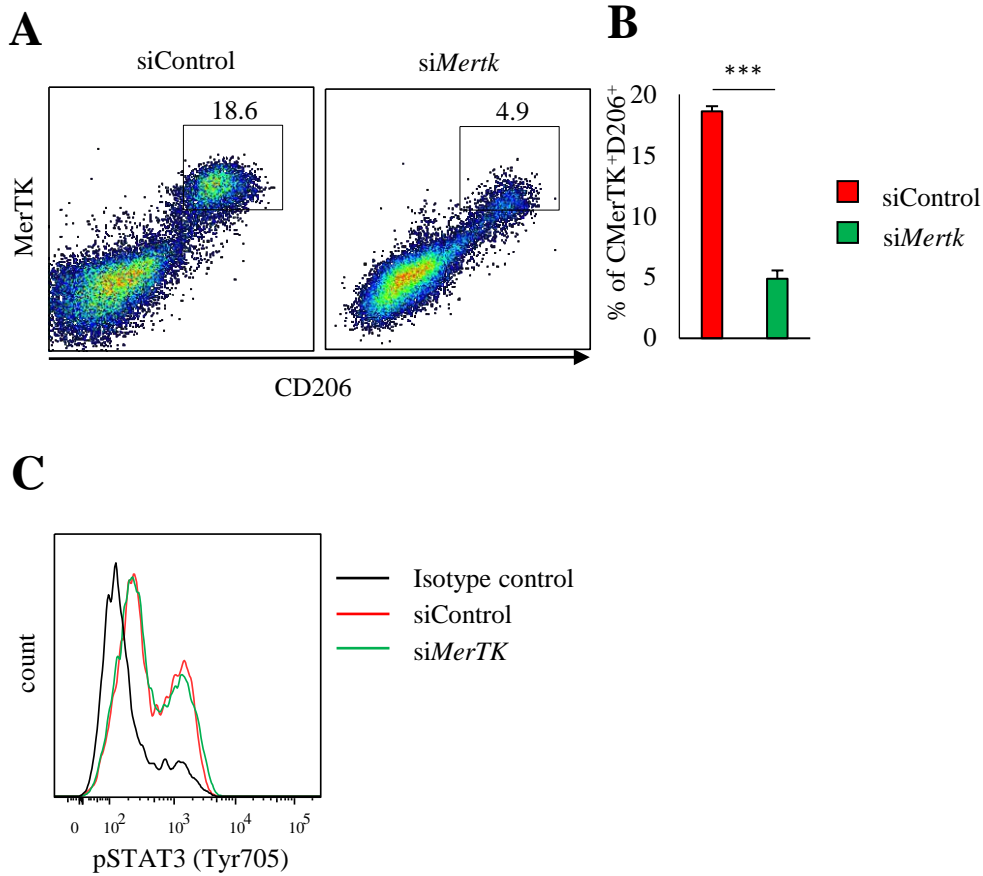

**A** CD11b<sup>+</sup>Ly6G<sup>-</sup> cells ( $2 \times 10^5$ ) were sorted from bone marrow of 8- to 10-week-old WT mice and cultured for 3 days with rIL-10 + DMSO or rIL-10 + STAT3 inhibitor. Representative flow cytometric analysis of MerTK<sup>+</sup> on CD206<sup>+</sup> in CD11b<sup>+</sup>Ly6G<sup>-</sup> cells (**A**) and bar graphs enumerate MerTK<sup>+</sup> on CD206<sup>+</sup> in CD11b<sup>+</sup>Ly6G<sup>-</sup> cells ( $n = 5$  per group) (**B**). Representative histogram of pSTAT3 (Tyr705) on CD11b<sup>+</sup>Ly6G<sup>-</sup> cells (**C**). Flow cytometric analysis was performed in at least three independent experiments. \* $P < 0.05$ , \*\*\* $P < 0.001$ ; n.s.: not significant. Data are mean  $\pm$  SEM.

## Figure S2. Apoptotic cells did not induce the transcriptional activity of *Spp1*.

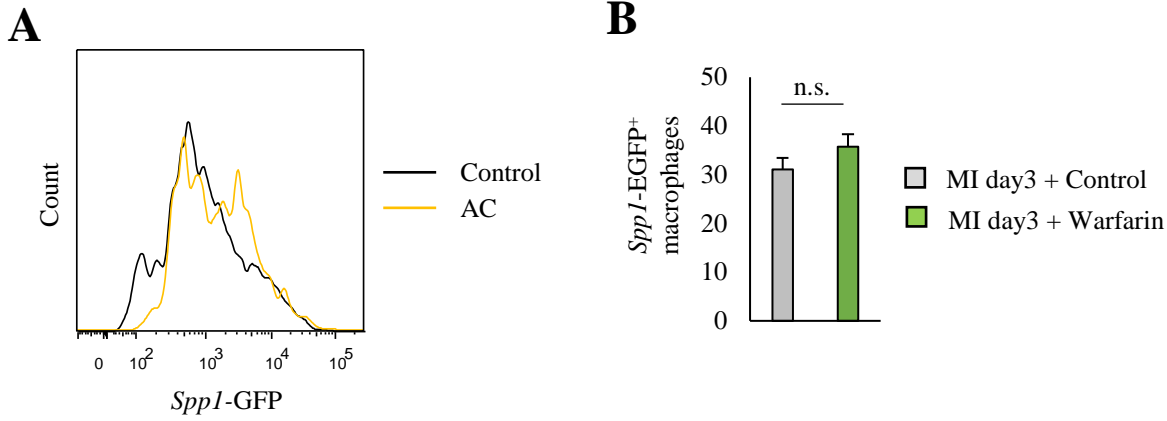

**A** Apoptotic cardiomyocytes treated with hydrogen peroxide and CD11b<sup>+</sup>Ly6G<sup>-</sup> cells were co-cultured for 72 hours. Representative histogram *Spp1*-GFP in CD11b<sup>+</sup>Ly6G<sup>-</sup> cells.

**B** DMSO or warfarin was administered via intravenous injection from 1 day before MI to post-MI day 3 into EGFP-*Spp1*-KI reporter mice. Bar graph shows the percentage of *Spp1*-GFP<sup>+</sup> cells in cardiac macrophages ( $n = 4$  mice per group)

# Figure S3. pSTAT3-MerTK-galectin-3 axis regulates osteopontin expression in vivo.

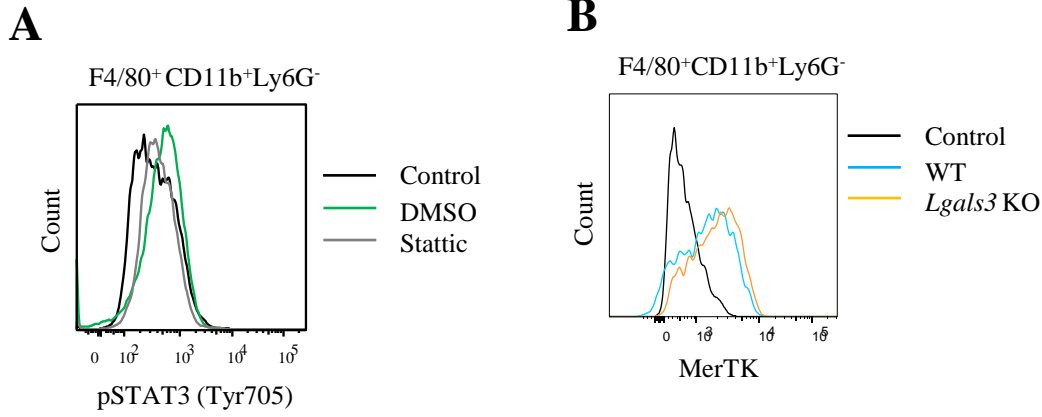

**A** DMSO or Stattic (STAT3 inhibitor) was administered via intraperitoneal injection from 1 day before MI to post-MI day 3 into WT mice. Representative histogram of pSTAT3 (Y705) on cardiac F4/80<sup>+</sup> CD11b<sup>+</sup>Ly6G<sup>-</sup> cells of DMSO or Stattic-treated mice. **B** Representative histogram of MerTK on cardiac F4/80<sup>+</sup>CD11b<sup>+</sup>Ly6G<sup>-</sup> cells of post-MI hearts on day 3 of WT and *Lgals3*-KO mice. Flow cytometric analysis was performed in at least three independent experiments.

**Figure S4. M-CSF is required for IL-10 to induce the differentiation of osteopontin-producing cells and up-regulate MerTK in vitro.**

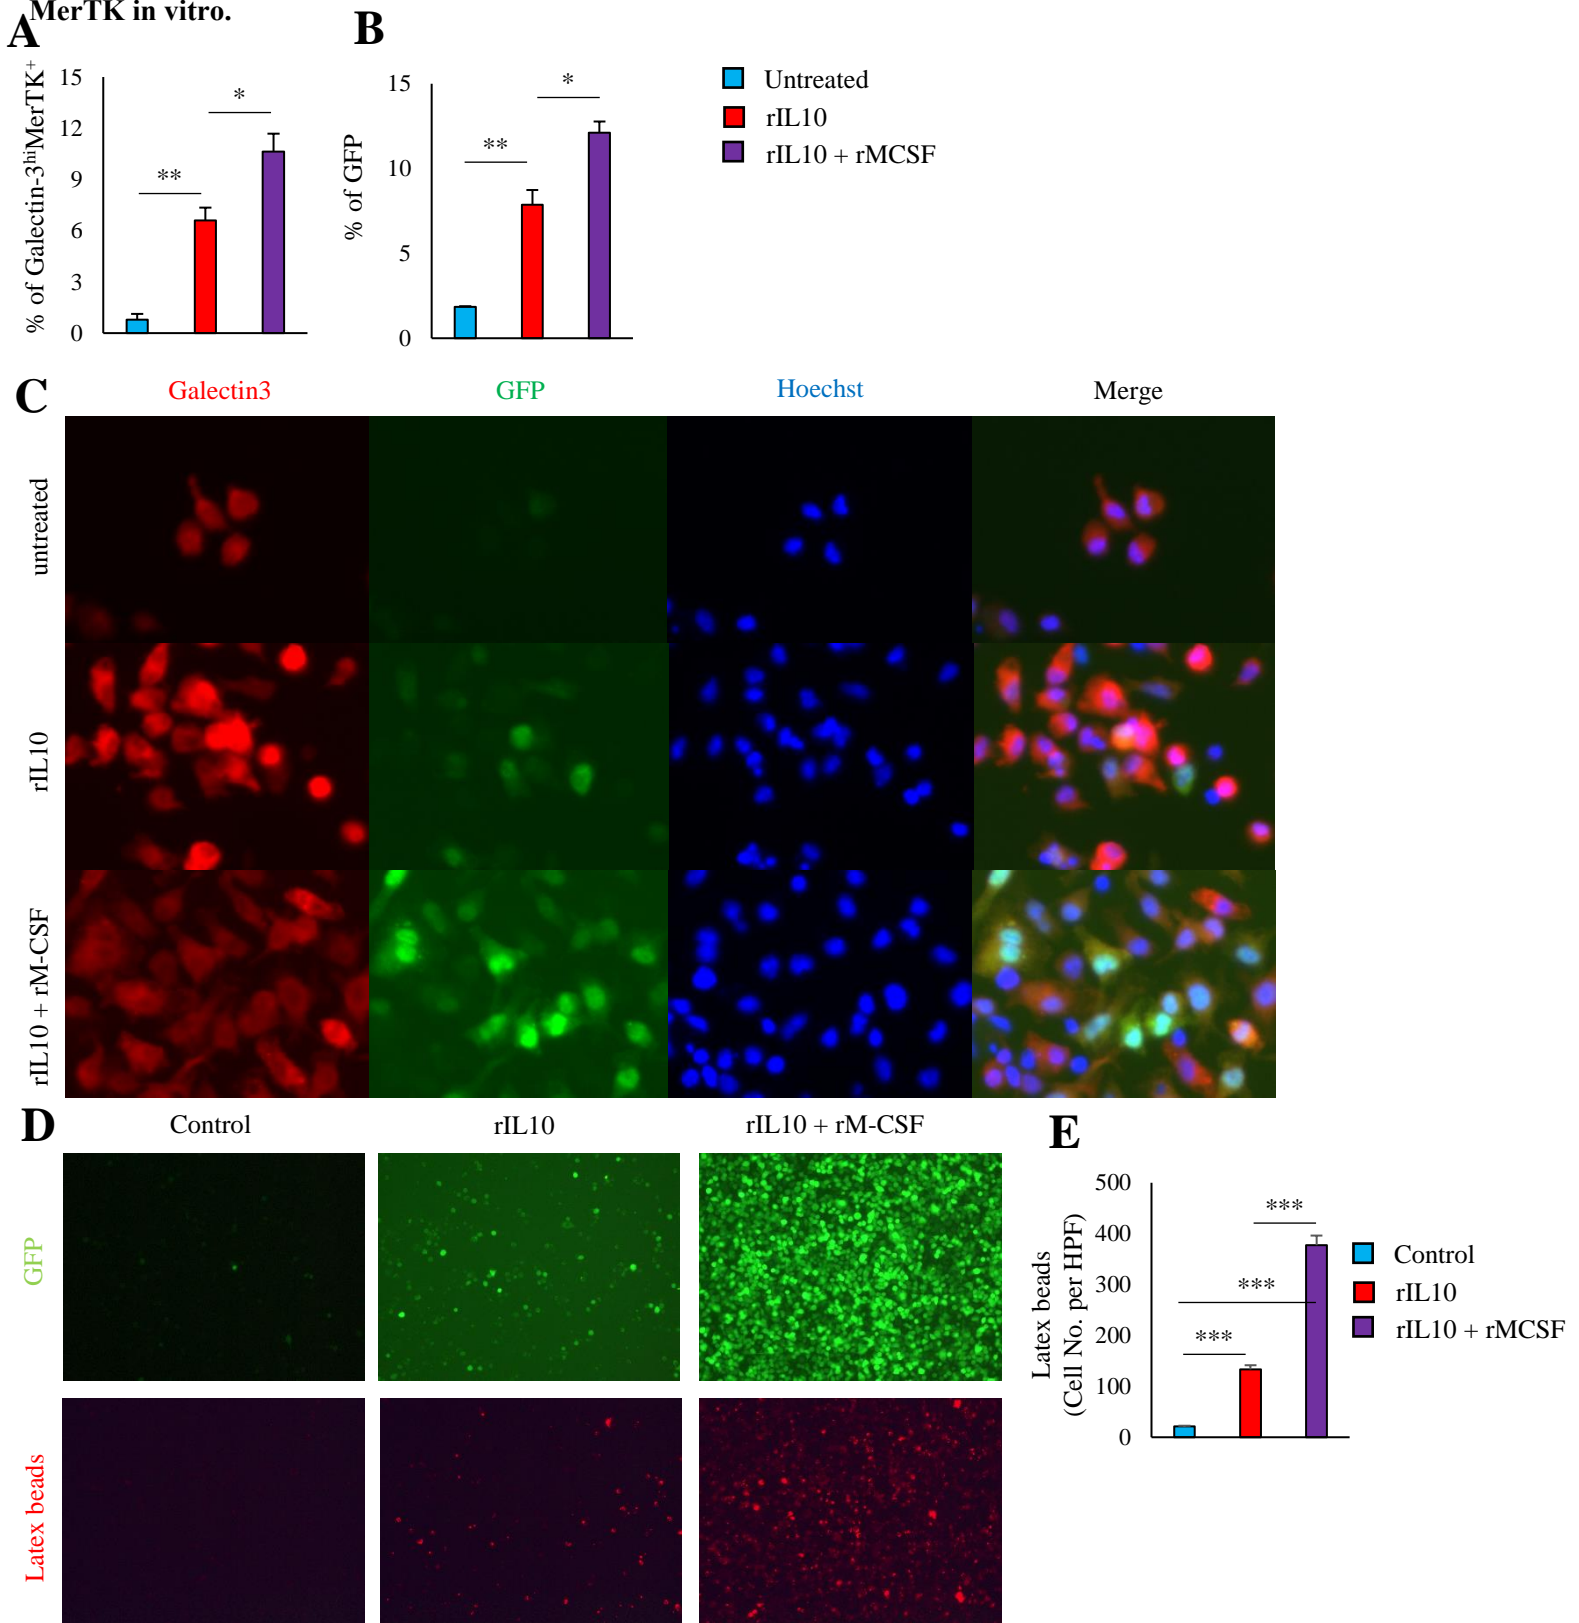

**A, B** CD11b<sup>+</sup>Ly6G<sup>-</sup> cells ( $2 \times 10^5$ ) were sorted from bone marrow of 8- to 10-week-old EGFP-*Spp1*-KI reporter mice and cultured for 3 days with rIL-10 or rIL-10 + rM-CSF or left untreated. Bar graphs enumerate percentage of galectin-3<sup>hi</sup> MerTK<sup>+</sup> cells (**A**) and *Spp1*-GFP (**B**) in CD11b<sup>+</sup>Ly6G<sup>-</sup> cells by flow cytometric analysis ( $n = 5$  per group). **C** CD11b<sup>+</sup>Ly6G<sup>-</sup> cells ( $2 \times 10^5$ ) were sorted from bone marrow of 8- to 10-week-old EGFP-*Spp1*-KI reporter mice and cultured for 3 days with rIL-10 or rIL-10 + rM-CSF or left untreated. Analysis of a fluorescence microscopy demonstrated galectin-3, EGFP-*Spp1* expression, and Hoechst. **D** Latex beads were added in cultured CD11b<sup>+</sup>Ly6G<sup>-</sup> cells sorted from bone marrow of 8- to 10-week-old EGFP-*Spp1*-KI reporter mice with indicated reagent for 4 hours. **E** Bar graphs enumerate the number of latex beads in high power field ( $n = 5$  mice per group). \* $P < 0.05$ , \*\* $P < 0.01$ , \*\*\* $P < 0.001$ ; n.s.: not significant. Data are mean  $\pm$  SEM.

**Figure S5. Activation of STAT3 alone is insufficient for the induction of osteopontin in vitro.**

**A**

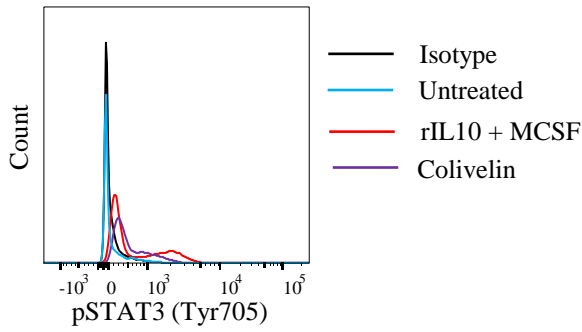

**B**

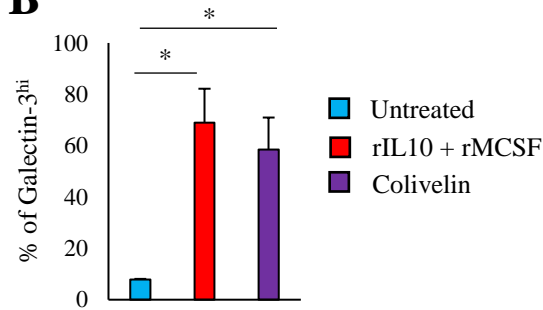

**C**

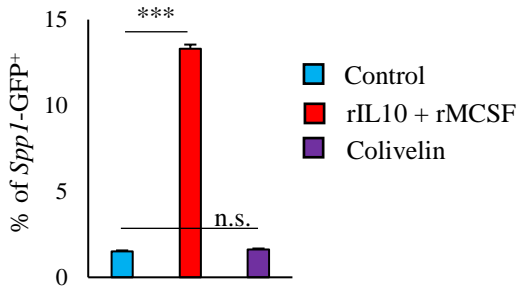

**D**

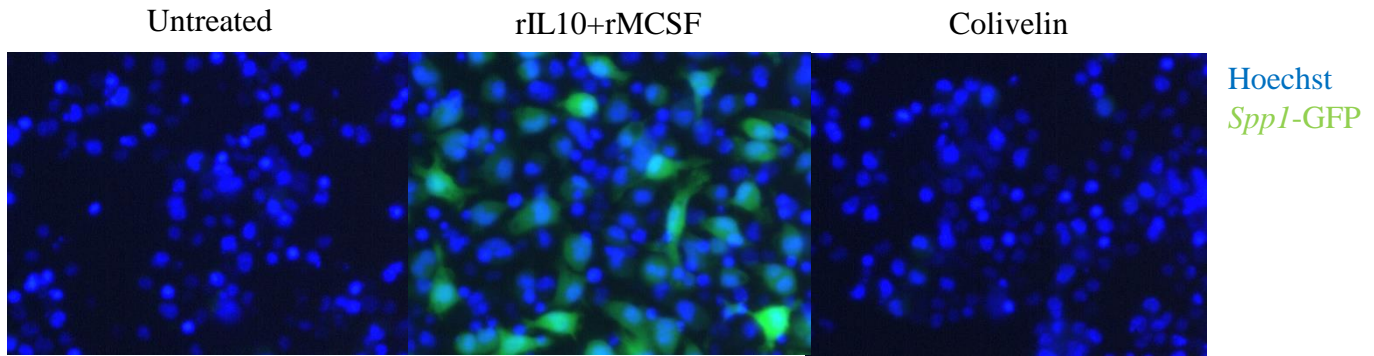

**A-D**  $2 \times 10^5$  CD11b<sup>+</sup>Ly6G<sup>-</sup> cells sorted from BM of EGFP-*Spp1*-KI reporter mice were cultured in IL-10 + M-CSF, Colivelin, or left untreated for 48 hours. **A** Representative histogram of pSTAT3 (Tyr705) in CD11b<sup>+</sup>Ly6G<sup>-</sup> cells by flow cytometric analysis. **B**, **C** Flow cytometric analysis of galectin-3<sup>hi</sup> (**B**) and *Spp1*-GFP expression (**C**) in CD11b<sup>+</sup>Ly6G<sup>-</sup> cells. Bar graphs enumerate percentage of these cells ( $n = 5$ ). **D** Analysis of a fluorescence microscopy demonstrated galectin-3, EGFP-*Spp1* expression, and Hoechst. \* $P < 0.05$ , \*\*\* $P < 0.001$ ; n.s.: not significant. Data are mean  $\pm$  SEM.

# Figure S6. ERK1/2 activation is required for *Spp1* transcriptional activity in vitro.

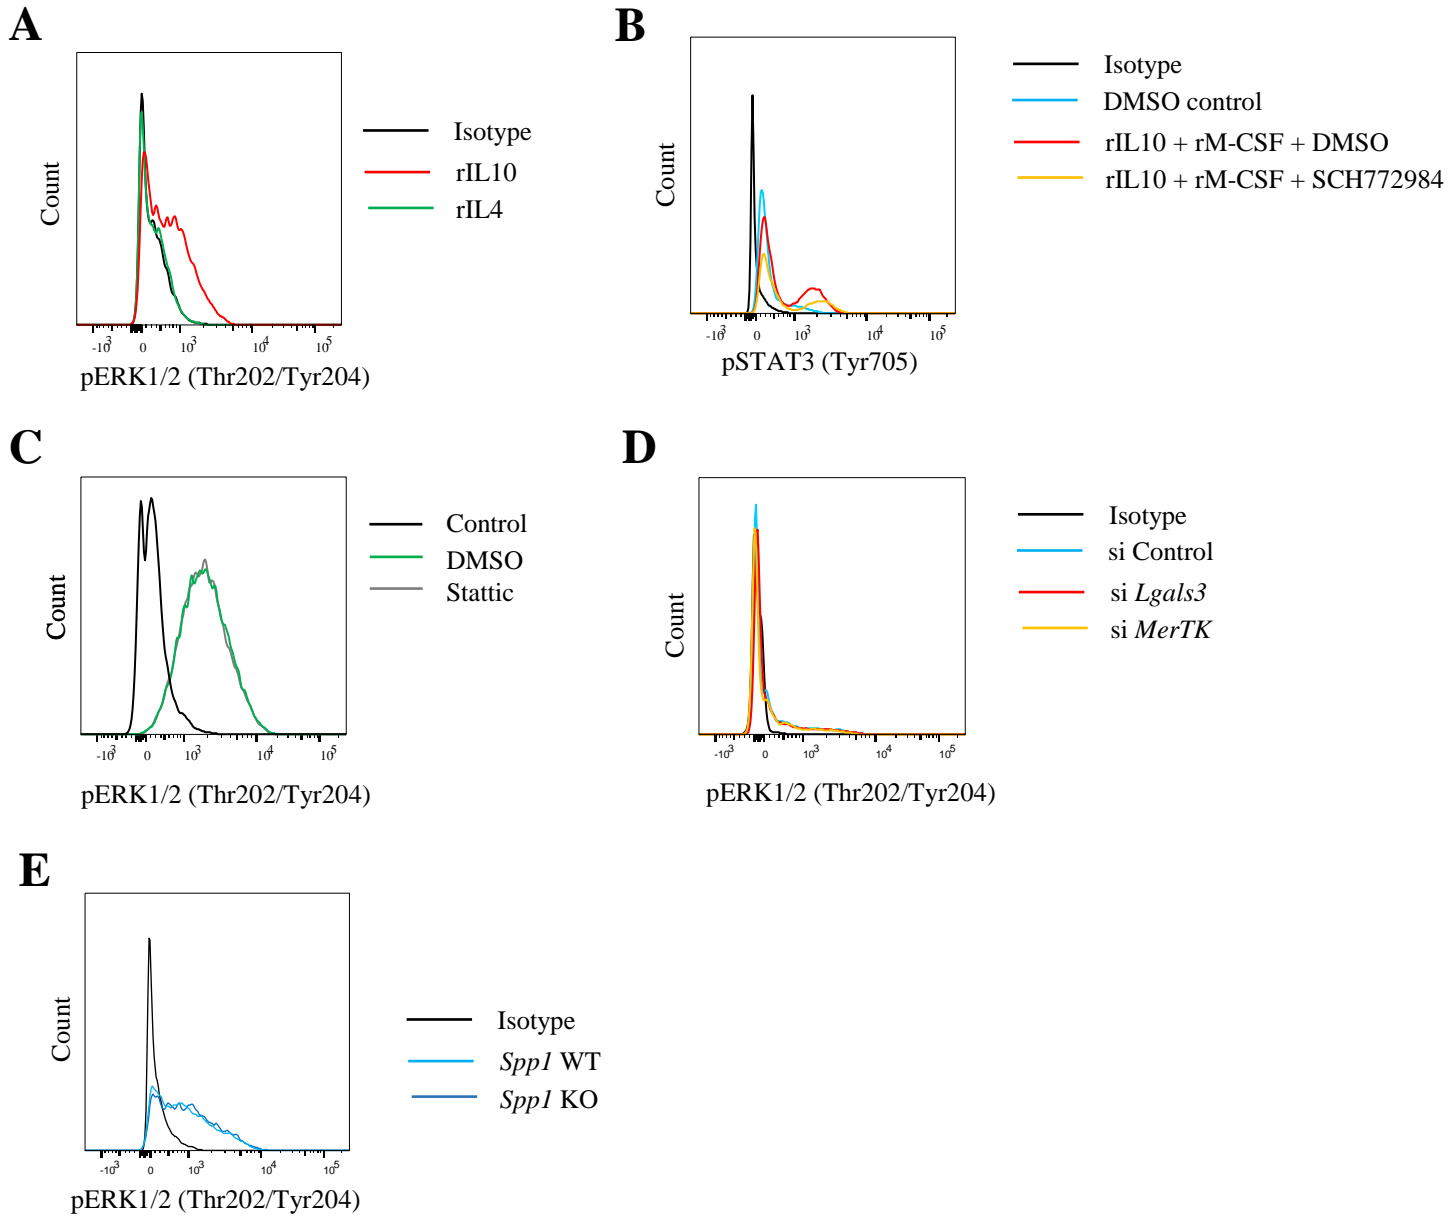

**A** CD11b<sup>+</sup>Ly6G<sup>-</sup> cells ( $2 \times 10^5$ ) were sorted from bone marrow of 8- to 10-week-old WT mice and cultured for 3 days with rIL-4 or rIL-10. Representative histogram of pERK1/2 (Thr202/Tyr204) in CD11b<sup>+</sup>Ly6G<sup>-</sup> cells by flow cytometric analysis. **B** CD11b<sup>+</sup>Ly6G<sup>-</sup> cells ( $2 \times 10^5$ ) were sorted from bone marrow of 8- to 10-week-old WT mice and cultured for 3 days with rIL-10 + rM-CSF + DMSO, rIL-10 + rM-CSF + SCH772984 (ERK1/2 inhibitor) or DMSO. Representative histogram of pSTAT3 (Tyr705) in CD11b<sup>+</sup>Ly6G<sup>-</sup> cells by flow cytometric analysis. **C** CD11b<sup>+</sup>Ly6G<sup>-</sup> cells ( $2 \times 10^5$ ) were sorted from bone marrow of 8- to 10-week-old WT mice and cultured for 3 days with rIL-10 + rM-CSF + DMSO or rIL-10 + rM-CSF + Stattic (STAT3 inhibitor). Representative histogram of pSTAT3 (Tyr705) in CD11b<sup>+</sup>Ly6G<sup>-</sup> cells by flow cytometric analysis. **D** CD11b<sup>+</sup>Ly6G<sup>-</sup> cells ( $2 \times 10^5$ ) were sorted from bone marrow of 8- to 10-week-old WT mice and cultured for 3 days with rIL-10 + rM-CSF with siControl, si*Lgals3*, or si*MerTK*. Representative histogram of pERK1/2 (Thr202/Tyr204) in CD11b<sup>+</sup>Ly6G<sup>-</sup> cells by flow cytometric analysis. **E** CD11b<sup>+</sup>Ly6G<sup>-</sup> cells ( $2 \times 10^5$ ) were sorted from bone marrow of 8- to 10-week-old WT or *Spp1* KO mice and cultured for 3 days with rIL-10 + rM-CSF. Representative histogram of pERK1/2 (Thr202/Tyr204) in CD11b<sup>+</sup>Ly6G<sup>-</sup> cells by flow cytometric analysis. Flow cytometric analysis was performed in at least three independent experiments.

# Figure S7. ERK1/2 activation is required for OPN transcriptional activity in vivo.

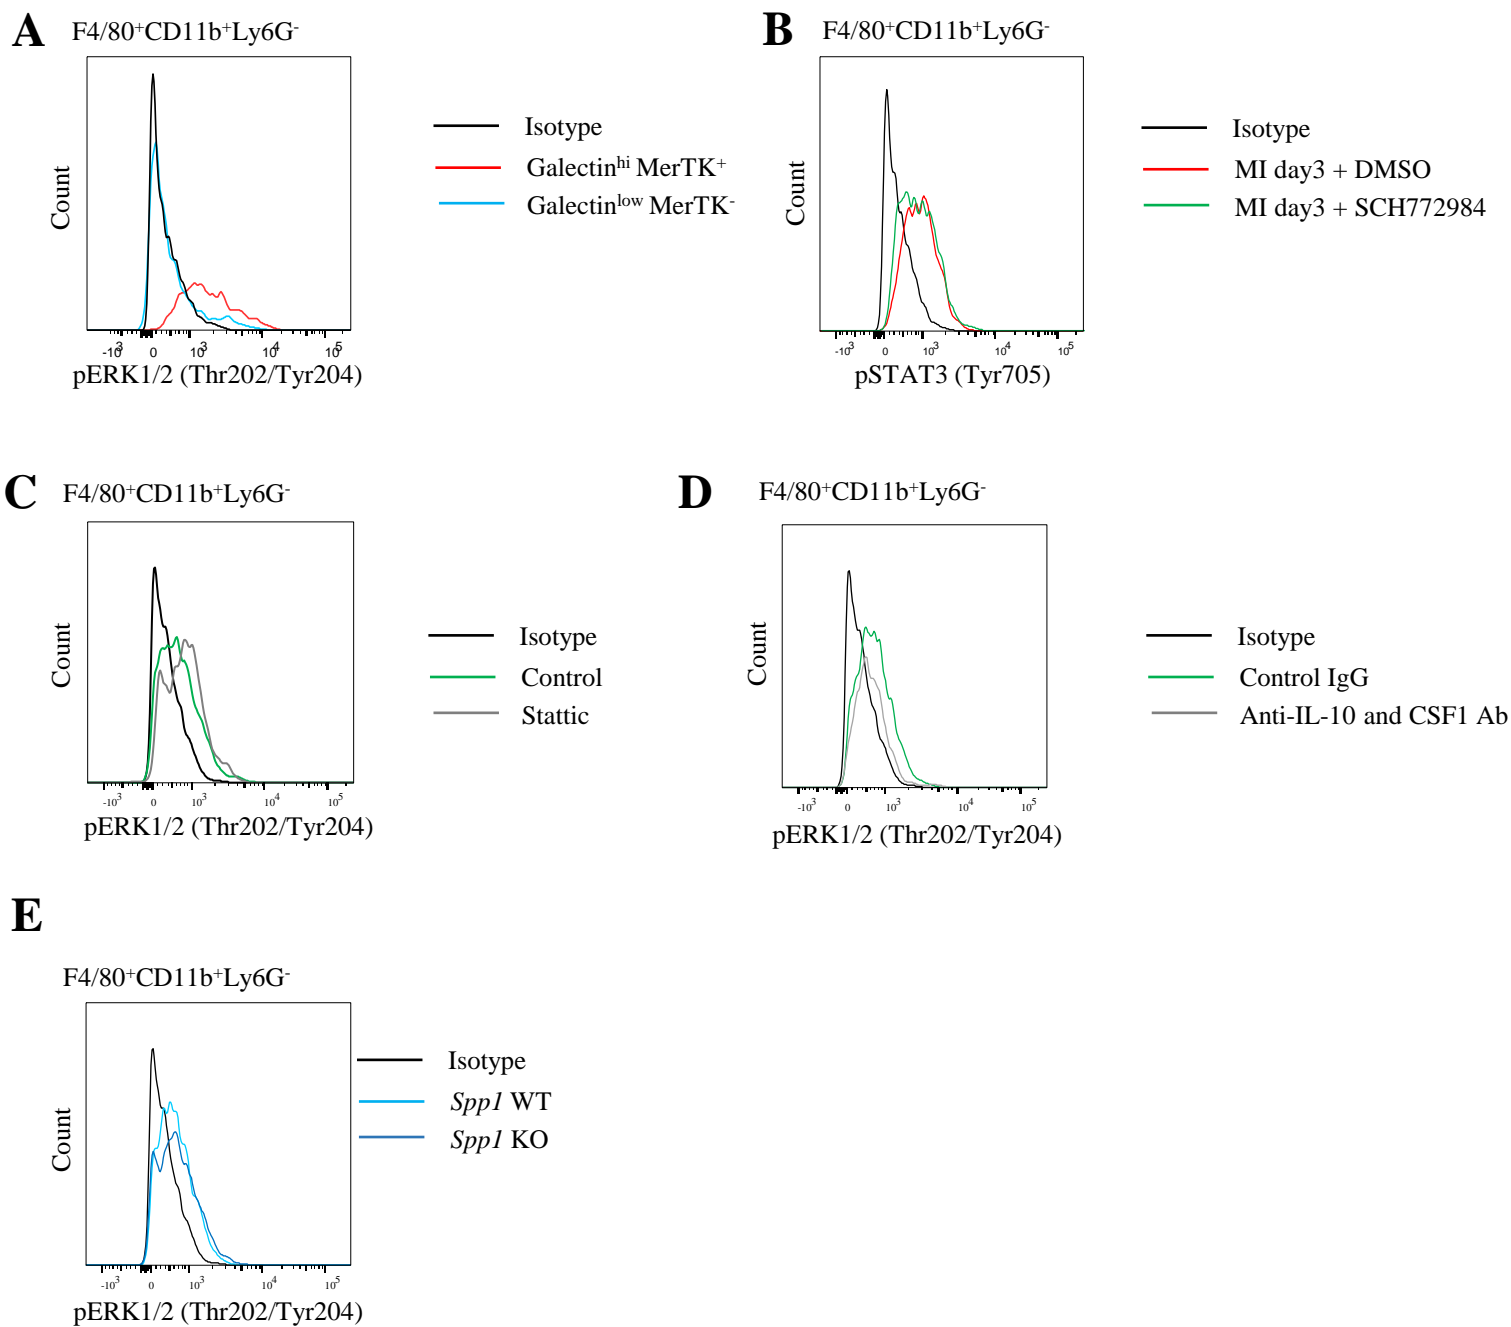

**A** Histogram of pERK1/2 (Thr202/Tyr204) on cardiac galectin-3<sup>hi</sup>MerTK<sup>+</sup> or galectin-3<sup>low</sup>MerTK<sup>-</sup> F4/80<sup>+</sup>CD11b<sup>+</sup>Ly6G<sup>-</sup> cells of post-MI hearts on day 3. **B** DMSO or SCH772984 (ERK1/2 inhibitor) was administered via intraperitoneal injection from 1 day before MI to post-MI day 3 into EGFP-*Spp1*-KI reporter mice. Histogram of pSTAT3 (Tyr705) on cardiac F4/80<sup>+</sup>CD11b<sup>+</sup>Ly6G<sup>-</sup> cells of DMSO or SCH772984-injected hearts. **C** DMSO or Stattic (STAT3 inhibitor) was administered via intraperitoneal injection from 1 day before MI to post-MI day 3 into WT mice. Representative histogram of pERK1/2 (Thr202/Tyr204) on cardiac F4/80<sup>+</sup>CD11b<sup>+</sup>Ly6G<sup>-</sup> cells of DMSO or Stattic-treated mice. **D** Control IgG or anti-IL10 antibody or anti-IL10 and anti-M-CSF antibody was administered via intraperitoneal injection from 1 day before MI to post-MI day 3 into EGFP-*Spp1*-KI reporter mice. Histogram of pERK1/2 (Thr202/Tyr204) on cardiac F4/80<sup>+</sup>CD11b<sup>+</sup>Ly6G<sup>-</sup> cells of control IgG or anti-IL10 antibody or anti-IL10 and anti-M-CSF antibody-injected hearts. **E** Histogram of pERK1/2 (Thr202/Tyr204) on cardiac F4/80<sup>+</sup>CD11b<sup>+</sup>Ly6G<sup>-</sup> cells of post-MI hearts of *Spp1* WT or *Spp1* KO mice on day 3. Flow cytometric analysis was performed in at least three independent experiments.



# Figure S8. rM-CSF treatment accelerates infarct repair after MI.

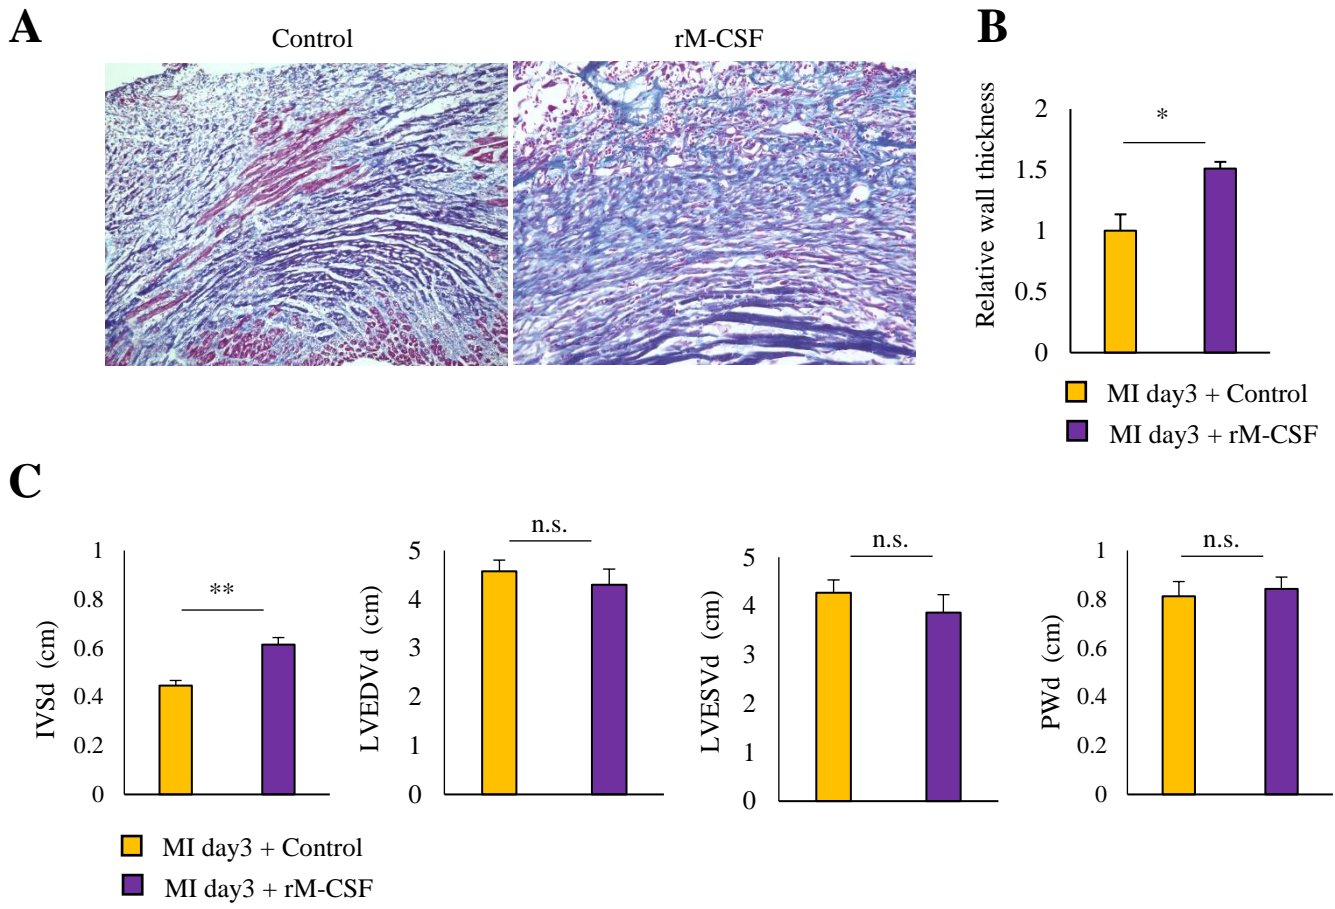

**A** Azan staining of post-MI heart on day 3 of EGFP-*Spp1*-KI reporter mice treated with control regent or rM-CSF. **B** Relative wall thickness of post-MI heart on day 3 of EGFP-*Spp1*-KI reporter mice treated with control regent or rM-CSF ( $n= 3$  mice per group). **C** Echocardiographic data after MI on day 7 ( $n= 6$  mice per group). LVESV, left ventricular end systolic diameter; LVEDV, left ventricular end diastolic diameter; IVSd, interventricular septum diameter; PWd, posterior wall diameter. \* $P < 0.05$ , \*\* $P < 0.01$ ; n.s.: not significant. Data are mean  $\pm$  SEM.
